# Supplementary material
Source: publisher figshare collection journal article supplement (https://acs.figshare.com/ndownloader/files/5826720)
Supplement: Supplementary file 1 [file 5826720]

**Supporting Information.****Isolation and identification of leucettamine B, preclathridine A and (9E)-clathridine 9-N-(2-sulfoethyl)imine.**

Isolation procedures of known compounds were mentioned in the **Experimental Section**, and identifications of these compounds were made based on the  $^{13}\text{C}$  and  $^1\text{H}$  NMR data tabulated as follows.

$^{13}\text{C}$ - and  $^1\text{H}$ - NMR Data (125 and 500 MHz, in acetone- $d_6$ ) of leucettamine B

| position <sup>b</sup> | leucettamine B<br>in literature <sup>a</sup> |                               | leucettamine B obtained<br>by our isolation |                                            |
|-----------------------|----------------------------------------------|-------------------------------|---------------------------------------------|--------------------------------------------|
|                       | $\delta_{\text{C}}$                          | $\delta_{\text{H}}$ (J in Hz) | $\delta_{\text{C}}^{\text{c}}$              | $\delta_{\text{H}}$ (J in Hz) <sup>c</sup> |
| 2                     | 160.2                                        |                               | 160.19                                      |                                            |
| 4                     | 170.5                                        |                               | 170.54                                      |                                            |
| 5                     | 140.4                                        |                               | 140.37                                      |                                            |
| 7                     | 114.6                                        | 6.42 (1H, s)                  | 114.69                                      | 6.43 (1H, s)                               |
| 8                     | 131.7                                        |                               | 131.74                                      |                                            |
| 9                     | 110.8                                        | 8.04 (1H, d, 1.6)             | 110.80                                      | 8.04 (1H, brs)                             |
| 10                    | 148.6                                        |                               | 148.57                                      |                                            |
| 11                    | 148.1                                        |                               | 148.08                                      |                                            |
| 12                    | 108.8                                        | 6.82 (1H, d, 8.1)             | 108.77                                      | 6.82 (1H, d, 8.1)                          |
| 13                    | 126.3                                        | 7.33 (1H, dd, 8.1, 1.6)       | 126.27                                      | 7.33 (1H, dd, 8.1, 1.4)                    |
| 3-NCH <sub>3</sub>    | 25.7                                         | 3.13 (3H, s)                  | 25.66                                       | 3.14 (3H, s)                               |
| 10-OCH <sub>2</sub> O | 102.0                                        | 6.01 (2H, s)                  | 102.04                                      | 6.01 (2H, s)                               |
| 6-NH <sub>2</sub>     |                                              | 6.72 (2H, brs)                |                                             | 6.71 (2H, brs)                             |

<sup>a</sup> Chan, G. W.; Mong, S.; Hemling, M. E.; Freyer, A. J.; Offen, P. H.; DeBrosse, C. W.; Sarau, H. M.; Westley, J. W. *J. Nat. Prod.* **1993**, *56*, 116-121.

<sup>b</sup> Position numberings were made based on the numberings in the literature (see **Structures for Supporting Information**).

<sup>c</sup> Chemical shifts are given on a  $\delta$  (ppm) scale with acetone- $d_6$  ( $^1\text{H}$  2.05 ppm;  $^{13}\text{C}$  29.80 ppm) as the internal standard.

<sup>13</sup>C- and <sup>1</sup>H- NMR Data (125 and 500 MHz, in CD<sub>3</sub>OD) of preclathridine A

| position <sup>b</sup> | preclathridine A<br>in literature <sup>a</sup> |                          | preclathridine A obtained<br>by our isolation |                                       |
|-----------------------|------------------------------------------------|--------------------------|-----------------------------------------------|---------------------------------------|
|                       | δ <sub>C</sub>                                 | δ <sub>H</sub> (J in Hz) | δ <sub>C</sub> <sup>c,d</sup>                 | δ <sub>H</sub> (J in Hz) <sup>c</sup> |
| 2                     | 148.1                                          |                          | 149.39                                        |                                       |
| 4                     | 126.4                                          |                          | 127.75                                        |                                       |
| 5                     | 113.8                                          | 6.72 (1H, s)             | 115.17                                        | 6.75 (1H, s)                          |
| 14                    | 31.0                                           | 3.71 (2H, s)             | 31.25 <sup>e</sup>                            | 3.74 (2H, s)                          |
| 1'                    | 130.5                                          |                          | 131.91                                        |                                       |
| 2'                    | 107.9                                          | 6.50 (1H, s)             | 109.30                                        | 6.52 (1H, s)                          |
| 3'                    | 146.8                                          |                          | 148.09                                        |                                       |
| 4'                    | 146.9                                          |                          | 148.20                                        |                                       |
| 5'                    | 108.6                                          | 6.69 (1H, d, 8.0)        | 109.97                                        | 6.73 (1H, d, 7.9)                     |
| 6'                    | 121.4                                          | 6.75 (1H, d, 8.0)        | 122.83                                        | 6.76 (1H, d, 7.9)                     |
| 7'                    | 101.1                                          | 5.89 (2H, s)             | 102.41                                        | 5.91 (2H, s)                          |
| 3-NCH <sub>3</sub>    | 29.9                                           | 3.41 (3H, s)             | 32.44 <sup>e</sup>                            | 3.45 (3H, s)                          |

<sup>a</sup> Alvi, K. A.; Peters, B. M.; Hunter, L. M.; Crews, P. *Tetrahedron* **1993**, *49*, 329-336.

<sup>b</sup> Position numberings were made based on the numberings in the literature (see **Structures for Supporting Information**).

<sup>c</sup> Chemical shifts are given on a δ (ppm) scale with TMS as the internal standard.

<sup>d</sup> Chemical shifts were constantly observed at 1.3-1.4 ppm larger values than those in literature.

<sup>e</sup> From DEPT experiments, the signal at δ 31.25 ppm was assigned as CH<sub>2</sub> and at δ 32.44 ppm as CH<sub>3</sub>. Thus, the assignment in the literature might be interchanged.

<sup>13</sup>C- and <sup>1</sup>H- NMR Data [125 and 500 MHz, in DMSO-*d*<sub>6</sub>-CDCl<sub>3</sub> (5:1)] of (9*E*)-clathridine 9-*N*-(2-sulfoethyl)imine

| position <sup>b</sup> | (9 <i>E</i> )-clathridine 9- <i>N</i> -(2-sulfoethyl)imine<br>in literature <sup>a</sup> |                          | (9 <i>E</i> )-clathridine 9- <i>N</i> -(2-sulfoethyl)imine<br>obtained by our isolation |                                       |
|-----------------------|------------------------------------------------------------------------------------------|--------------------------|-----------------------------------------------------------------------------------------|---------------------------------------|
|                       | δ <sub>C</sub>                                                                           | δ <sub>H</sub> (J in Hz) | δ <sub>C</sub> <sup>c</sup>                                                             | δ <sub>H</sub> (J in Hz) <sup>c</sup> |
| 2                     | 144.0                                                                                    |                          | 144.30                                                                                  |                                       |
| 4                     | 130.9                                                                                    |                          | 130.91                                                                                  |                                       |
| 5                     | 116.9                                                                                    | 7.14 (1H, s)             | 116.86                                                                                  | 7.08 (1H, s)                          |
| 7                     | 160.0                                                                                    |                          | 160.05                                                                                  |                                       |
| 9                     | 165.0                                                                                    |                          | 164.78                                                                                  |                                       |
| 11                    | 164.0                                                                                    |                          | 164.15                                                                                  |                                       |
| 12                    | 32.6                                                                                     | 3.67 (3H, s)             | 32.62                                                                                   | 3.67 (3H, s)                          |
| 13                    | 26.0                                                                                     | 3.13 (3H, s)             | 26.01                                                                                   | 3.14 (3H, s)                          |
| 14                    | 29.9                                                                                     | 4.03 (2H, s)             | 30.09                                                                                   | 4.02 (2H, s)                          |
| 16                    | 49.8                                                                                     | 3.95 (2H, t, 6.5)        | 49.97                                                                                   | 3.98 (2H, t, 6.7)                     |
| 17                    | 38.3                                                                                     | 2.94 (2H, t, 6.5)        | 39.51                                                                                   | 2.98 (2H, t, 6.7)                     |
| 1'                    | 131.1                                                                                    |                          | 131.15                                                                                  |                                       |
| 2'                    | 109.2                                                                                    | 7.01 (1H, brs)           | 109.27                                                                                  | 6.98 (1H, d, 1.5)                     |
| 3'                    | 147.3                                                                                    |                          | 147.35                                                                                  |                                       |
| 4'                    | 145.0                                                                                    |                          | 146.01                                                                                  |                                       |
| 5'                    | 108.1                                                                                    | 6.84 (1H, d, 7.9)        | 108.26                                                                                  | 6.83 (1H, d, 7.9)                     |
| 6'                    | 121.8                                                                                    | 6.91 (1H, d, 7.9)        | 121.98                                                                                  | 6.91 (1H, dd, 7.9, 1.5)               |
| 7'                    | 100.7                                                                                    | 5.97 (2H, s)             | 100.76                                                                                  | 5.96 (2H, s)                          |

<sup>a</sup> He, H-Y.; Faulkner, D. J.; Lee, A. Y.; Clardy, J. *J. Org. Chem.* **1992**, *57*, 2176-2178.

<sup>b</sup> Position numberings were made based on the numberings in the literature (see **Structures for Supporting Information**).

<sup>c</sup> Chemical shifts are given on a δ (ppm) scale with TMS as the internal standard.

Structures for Supporting Information

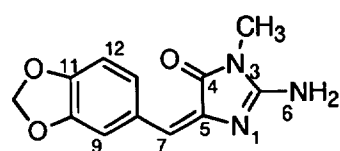

leucettamine B

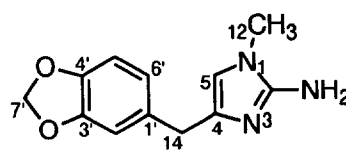

preclathridine A

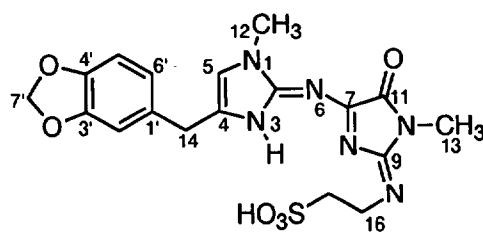

(9E)-clathridine 9-N-(2-sulfoethyl)imine
